# Supplementary material for: Induced organoids derived from patients with ulcerative colitis recapitulate colitic reactivity
Source: PubMed Central journal article supplement (PMC7801686; doi:10.1038/s41467-020-20351-5), 2021-01-11
Supplement: 41467_2020_20351_MOESM1_ESM.pdf [file 41467_2020_20351_MOESM1_ESM.pdf]

## Supplementary Figure 1 related to Figure 1

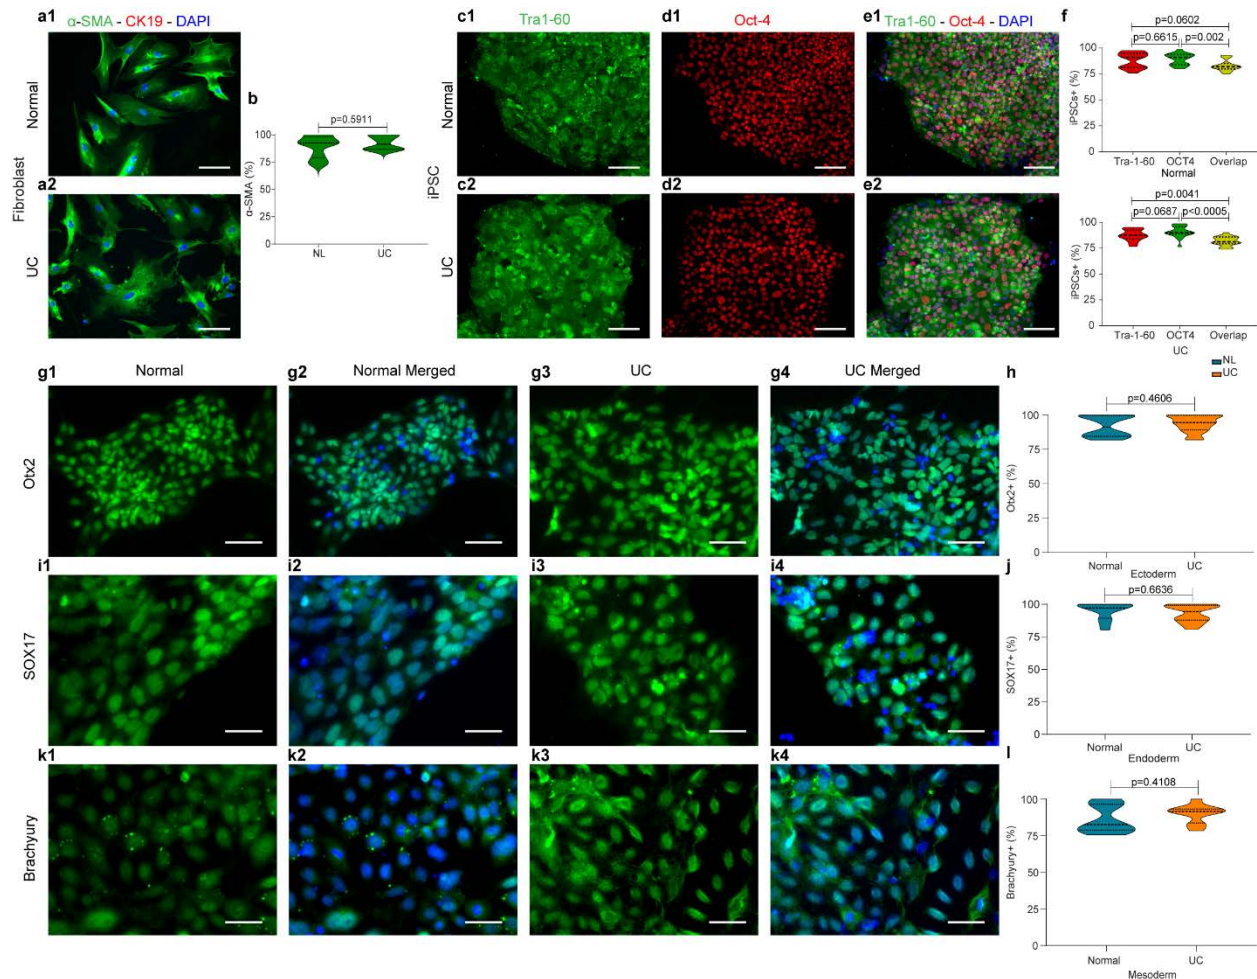

### Supplementary Fig. 1: Confirmation of pluripotency in induced pluripotent stem cells

**a** Representative IF staining to demonstrate  $\alpha$ -SMA (green) expression and absence of CK19 (red) in normal and UC parental fibroblasts. **b** Violin plots showing the distribution of the cells expressing  $\alpha$ -SMA and CK19 in normal and UC fibroblasts. **c, d, e** Representative dual IF staining for Tra-1-60 (green) and Oct-4 (red) pluripotent markers in normal and UC iPSCs. **f** Violin plots for the iPSCs expressing Tra-1-60, Oct-4, or both. **g, i, k** Representative IF staining for Otx2 (green), SOX17 (green), and brachyury (green), confirming the differentiation of the iPSCs to ectoderm, endoderm, and mesoderm, respectively. **h, j, l** Percentage distribution of the cells expressing Otx2, SOX17, and brachyury, respectively. Nuclei in all IF images were counterstained for DAPI (blue). An unpaired, non-parametric, two-sided Mann-Whitney  $U$  test was used for all statistical comparisons. Scale bar= 25  $\mu$ m.  $n=5$  iHNOs and  $n=6$  iHUCOs. Source data are provided as a Source Data file.

## Supplementary Figure 2 related to Figure 1 & 2

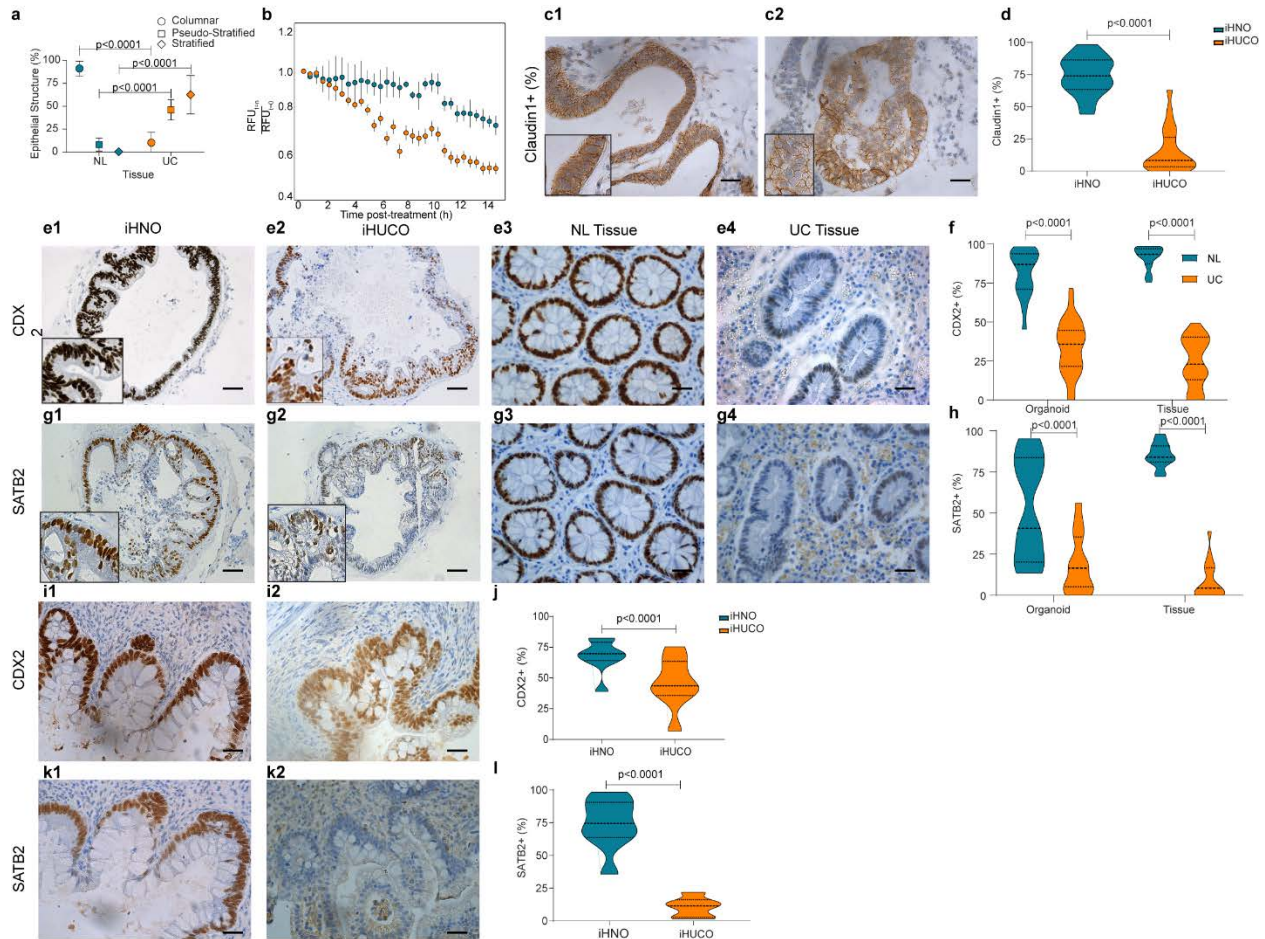

### Supplementary Fig. 2: iHUCOs reveal a disruption in tight junctions and differentiation pattern as compared to iHNOs

**a** Percentage distribution of epithelial structure types -- columnar, pseudostratified, and stratified -- in the normal and UC matched primary tissues. The median value is indicated in the center of the box plot. The whiskers above and below the box plot represent 1 standard deviation above and below the mean of the data, respectively. **b** Epithelial barrier permeability measurements in real time for iHNOs (blue) and iHUCOs (orange) for 15 hours. Each independent biological sample was comprised 50-70 organoids pooled together per experiment for further analyses. **c, d** Representative IHC and quantification (shown as violin plots) for organoid cells expressing claudin-1. **e, g** Representative IHC for CDX2 and SATB2, demonstrating the lower expression of both proteins in UC and normal organoids with their matched primary tissues. **f, h** Violin plot of cells expressing CDX2 and SATB2 in iHNOs and iHUCOs and the primary tissues. **i, k** Representative IHC for CDX2 and SATB2 organoid-derived colon with **j, l** percentage distribution of cells expressing each protein, confirming a significant decrease in expression of CDX2 and SATB2 in UC vs. normal epithelium. An unpaired, non-parametric, two-sided Mann-Whitney *U* test was used for all statistical comparisons except for panel b, in which the non-

parametric Wilcoxon rank-sum test was used. Scale bar = 40  $\mu\text{m}$ . n = 5 iHNOs and n = 6 iHUCOs except for barrier studies, n = 1. Source data are provided as a Source Data file.

## Supplementary Figure 3 related to Figure 4

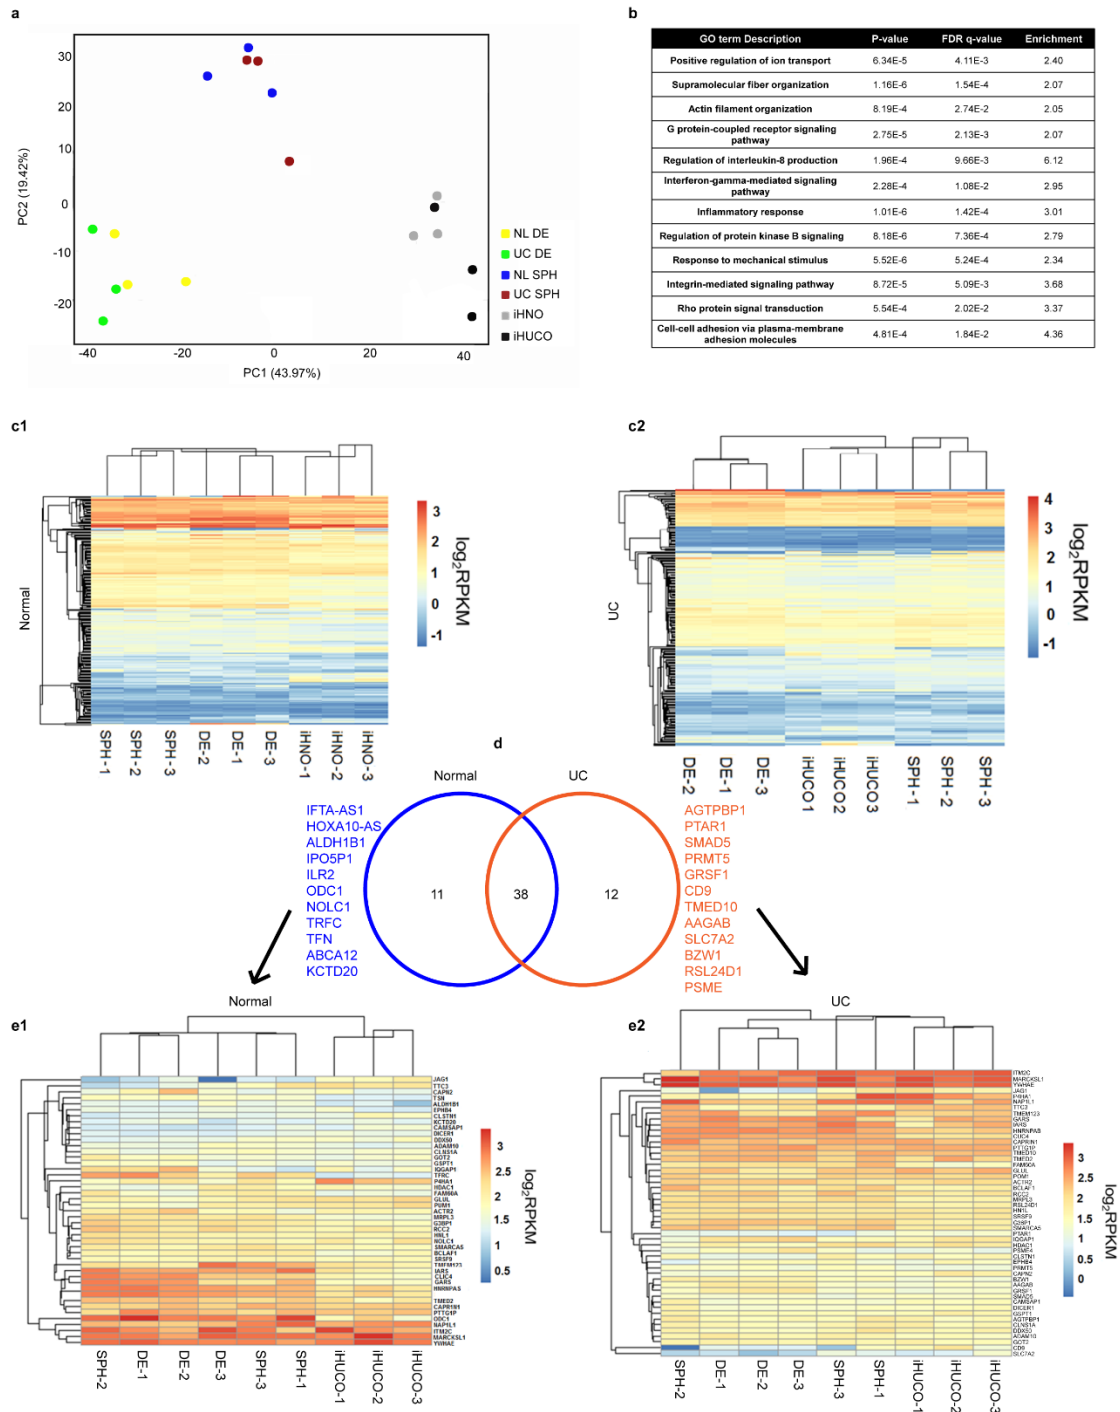

**Supplementary Fig. 3:** Bulk transcriptomic analysis of iHUCOs reveals the colonic identity. **a** Principal component analyses (PCA) conducted on normal and UC definitive endoderm (DE), spheroids (SPH), and organoids (n=3 each). The first principal component accounts for about 44% of the variation in the data. **b** Table of *P* values, FDR *q*-values, and enrichment scores for the enriched GO terms shown as REVIGO scatterplots<sup>1</sup> in Fig. 4e. **c** Heatmaps of the genes upregulated in colonic and small intestinal organoids and tissues reported by Munero et al<sup>2</sup>.

confirming the distinct developmental pattern in iHUCOs. **d** Venn diagram of the top 50 expressed genes in iHNOs and iHUCOs (extracted from the gene sets in panel c) with genes exclusive to normal (blue) or UC (orange). **e** Curated heatmaps for the top 50 genes in panel c to compare the normal and UC developmental signature.

## Supplementary Figure 4 related to Figure 5

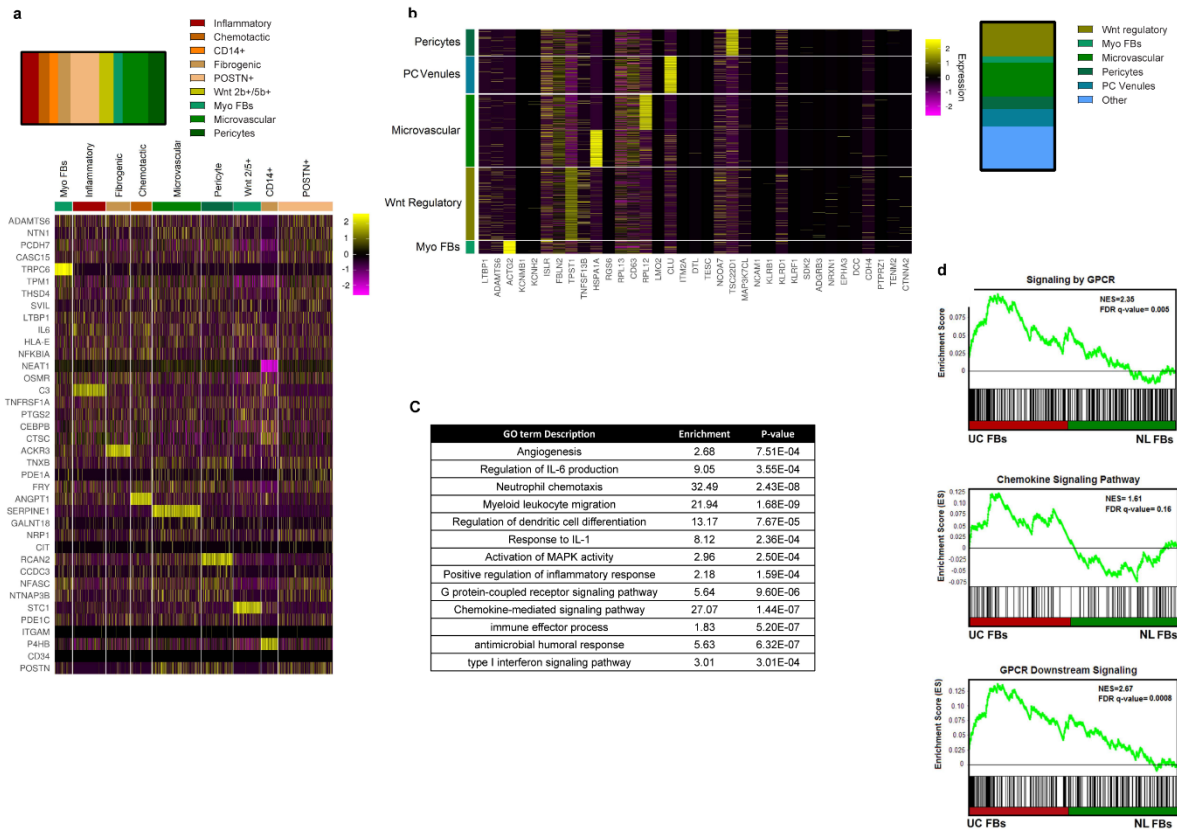

### Supplementary Fig. 4 High-resolution transcriptomic analysis of the parental fibroblasts

**a** Proportion plot (top) and a heatmap (bottom) of highly expressed markers of the cell sub-populations in UC fibroblasts; Myo FBs = myofibroblasts; Wnt 2/5B+= Wnt2B+ and Wnt5B+ cells.. **b** Heatmap of highly expressed markers in normal fibroblast subsets with a proportion plot illustrating the cell sub-populations in normal fibroblasts; Myo FBs = myofibroblasts; PC venules= post-capillary venules. **c** Table of enrichment scores and *P* values for the GO terms presented as REVIGO scatterplots<sup>1</sup> in Fig. 5d. **d** Highly significant terms based on GSEA analysis of UC (red) vs. normal (green) fibroblasts, highlighting the role of GPCR and chemokine-mediated signaling in UC. Source data are provided as a Source Data file.

## Supplementary Figure 5 related to Figure 6 & 7

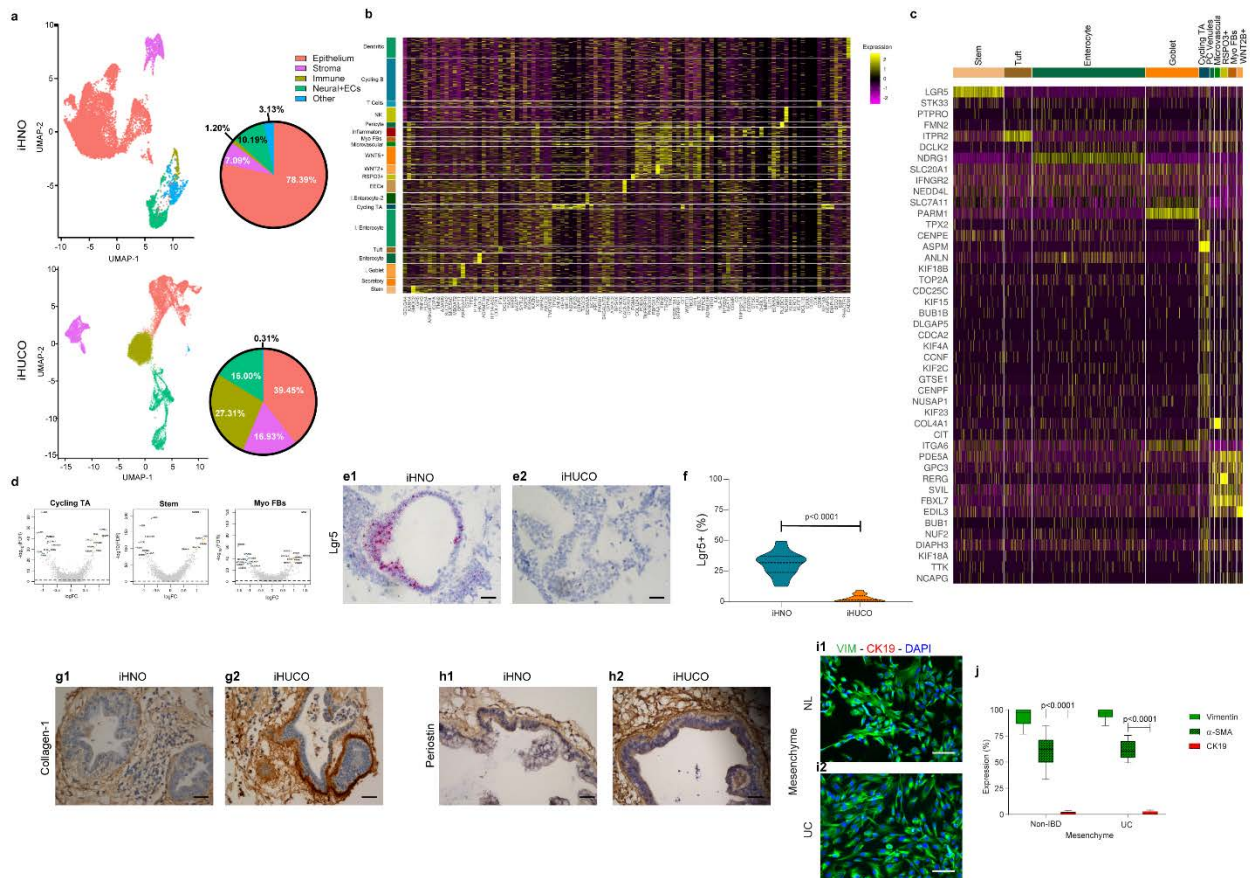

### Supplementary Fig. 5 High-resolution transcriptomic analysis of iHNOs and iHUCOs

**a** UMAPs based on cell types in the organoids, highlighting 4 main cell types: epithelial, mesenchymal, immune, and neural + endothelial cells, with pie charts showing the proportion of each cell type in iHNOs and iHUCOs. Percentages of the indicated cell populations are indicated in the pie graphs.

**b** Heatmap of highly expressed markers in each iHUCO epithelium and stroma subset.

**c** Heatmap of highly expressed markers in iHNO epithelium and mesenchyme.

**d**, Volcano plots for the selected subtypes highlight the highly significantly up- and down- regulated genes in iHUCOs.

**e** Representative in situ hybridization for *Lgr5* in iHNOs and iHUCOs, with violin plots expressing *Lgr5* in these organoids.

**f**. A violin plot of the percentage of *Lgr5*<sup>+</sup> cells in the iHNO compared to iHUCO.

**g**, **h** Representative IHC for collagen type-1 and periostin in the organoids, highlighting the excessive production of both proteins in the stroma of iHUCOs when compared to iHNOs.

**i** Representative IF staining of iHNO- and iHUCO-derived mesenchyme expressing vimentin (green) and lacking CK19 (red), with **j** summarized percentages of cells positive for vimentin,  $\alpha$ -SMA (fibroblast markers), and CK19 (epithelium marker). The median value is indicated in the center of the box plot. The whiskers above and below the plot represent 1 standard deviation (SD) above and below the mean of the data, respectively. IF scale bar = 25 $\mu$ m. n = 5 iHNOs and n=6 iHUCOs, For comparisons in e and j, n unpaired, non-parametric, two-sided Mann-Whitney *U* test was used for all statistical comparisons. IHC scale bar = 40  $\mu$ m. n=5 iHNOs (blue) and n=6 iHUCOs (orange). Source data are provided as a Source Data file.

## Supplementary Figure 6 related to Figure 8 & 9

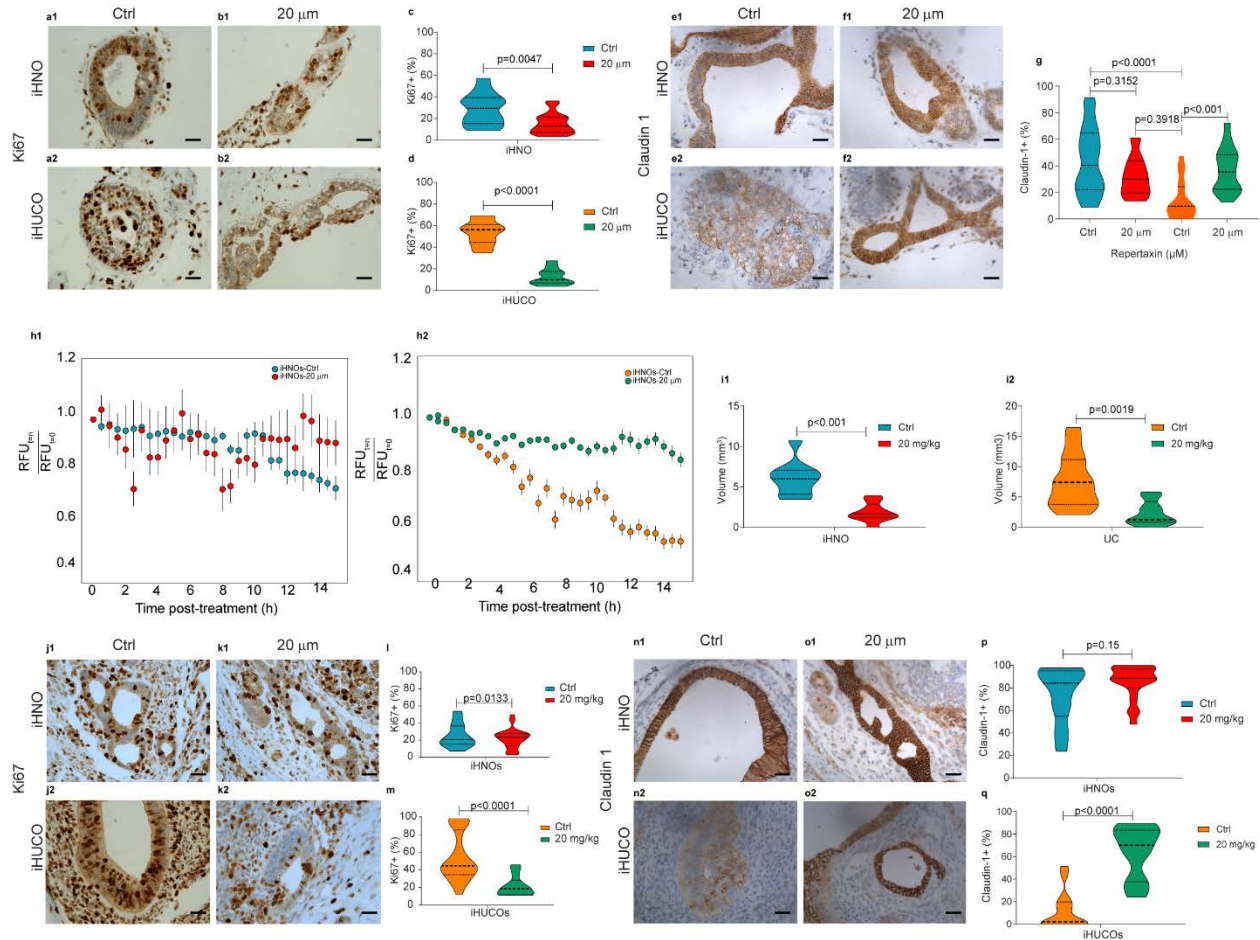

### Supplementary Fig. 6: Repertaxin alters *in vitro* and *in vivo* the colitic signature in iHUCO epithelium

**a-d** Representative IHC for Ki67 in repertaxin-treated (20 μM) iHNOs and iHUCOs compared to control (Ctrl) organoids with percentage distribution of cells expressing Ki67 in all groups; **c, e, f** Representative IHC for claudin-1 in organoids with or without repertaxin treatment. **g** Violin plots showing the distribution of claudin-1-positive cells in repertaxin-treated and control organoids. **h** Relative epithelial barrier permeability to 4 kDa dextran measured in real time for control iHNOs (blue, n = 11) vs. repertaxin-treated iHNOs (red, n = 10) and control iHUCOs (orange, n = 17) vs. repertaxin-treated iHUCOs (green, n = 16) over 15 hours, demonstrating that repertaxin treatment significantly decreased iHUCO epithelial barrier permeability. Each independent biological sample was comprised 50-70 organoids pooled together per experiment for further analyses. **i** The calculated average volume (based on measurement with calipers) of the subcutaneously implanted organoids after 21 days with or without repertaxin injection was greater in control than repertaxin-treated organoids. **j, k, n, o** Representative IHC for Ki67 and claudin-1 in repertaxin-treated and control organoids after 21 days' treatment *in vivo*. **l, m, p, q** Violin plots of cells positive for Ki67 and claudin-1 in the presence or absence of repertaxin treatment *in vivo*. The unpaired, nonparametric Mann-Whitney U test was used for all comparisons excepting h1,2, in which the non-parametric Wilcoxon rank-sum test was used. The median value is indicated in the center of the box plot. The whiskers above and below the plot represent 1 standard deviation (SD) above and below the mean of the data, respectively. Scale bar = 40 μm. n = 5 iHNOs (blue) and n = 6 iHUCOs for a-g; n = 3 for j-q. Source data are provided as a Source Data file.



## References

1. Supek F, Bosnjak M, Skunca N, Smuc T. REVIGO summarizes and visualizes long lists of gene ontology terms. *PLoS one*. 2011;6(7):e21800.
2. Munera JO, Sundaram N, Rankin SA, et al. Differentiation of Human Pluripotent Stem Cells into Colonic Organoids via Transient Activation of BMP Signaling. *Cell Stem Cell*. 2017;21(1):51-64 e56.

**Supplementary Table 1: Patient demographics**

| Patient ID | Disease | Pathology (overall) | M/F | Race  | Disease Duration (Years) | Age at resection |
|------------|---------|---------------------|-----|-------|--------------------------|------------------|
| CRL1541    | Normal  | Normal              | F   | NA    | NA                       | 22 weeks         |
| NL-34      | Cancer  | Normal Margin       | M   | White | NA                       | 70               |
| NL-33      | Cancer  | Normal Margin       | M   | White | NA                       | 62               |
| NIBD -227  | Cancer  | Normal Margin       | F   | White | 27                       | 65               |
| NIBD-304   | Non-IBD | Normal              | F   | White | 8                        | 37               |
| UC-5       | UC      | Active UC           | M   | White | 2                        | 20               |
| UC-40      | UC      | Active UC           | M   | White | 2                        | 32               |
| UC-35      | UC      | Active UC           | F   | White | 30                       | 47               |
| UC-301     | UC      | Active UC           | F   | White | 2                        | 70               |
| UC-303     | UC      | Active UC           | M   | White | 4                        | 44               |
| UC-307     | UC      | Active UC           | M   | White | 7                        | 36               |

**Supplementary Table 2: Short-tandem repeat fingerprinting**

| Patient ID | D13S31<br>7 | D16S53<br>9 | CSF1PO | TH01   | vWA    | D21S11   | D7S820 | D5S818 | TPOX   | AMEL |
|------------|-------------|-------------|--------|--------|--------|----------|--------|--------|--------|------|
| CRL1541    | 12          | 10,11       | 9,13   | 6,7    | 16,18  | 28,30    | 8,9    | 12     | 8      | X    |
| NL-34      | 11,12       | 9,12        | 11,12  | 9.3    | 14,17  | 29,30    | 9,12   | 11,12  | 8      | X,Y  |
| NL-33      | 11          | 11,12       | 11,12  | 8,9.3  | 15,17  | 29,32.2  | 10,12  | 9,11   | 8      | X,Y  |
| NL-227     | 11, 12      | 12, 14      | 10, 11 | 7, 9.3 | 14, 17 | 31       | 10     | 11, 12 | 8, 10  | X    |
| NL-304     | 12          | 11, 12      | 10, 11 | 7, 9   | 14, 17 | 29, 30   | 11     | 12     | 11, 12 | X    |
| UC-5       | 11          | 9,11        | 12     | 6,7    | 16,17  | 29,32.2  | 8      | 11,13  | 8,11   | X,Y  |
| UC-40      | 10,11       | 10          | 10,11  | 9.3    | 18,20  | 28,31    | 10,12  | 10,13  | 8,12   | X,Y  |
| UC-35      | 10,12       | 12          | 11,13  | 8,9.3  | 14,18  | 28,31    | 10,13  | 12,13  | 8,11   | X    |
| UC-301     | 11, 14      | 9, 11       | 11, 13 | 6, 7   | 15     | 28, 29   | 11, 12 | 11     | 8      | X    |
| UC-303     | 9, 10       | 11, 13      | 12     | 6, 9.3 | 17, 18 | 28, 29   | 11, 12 | 11, 12 | 8      | X, Y |
| UC-307     | 12, 13      | 10, 12      | 10, 12 | 8, 9.3 | 16, 17 | 30, 32.2 | 8, 9   | 9, 12  | 8, 11  | X, Y |
