# Supplementary material for: Induced organoids derived from patients with ulcerative colitis recapitulate colitic reactivity
Source: PubMed Central journal article supplement (PMC7801686; doi:10.1038/s41467-020-20351-5), 2021-01-11
Supplement: 41467_2020_20351_MOESM5_ESM.pdf [file 41467_2020_20351_MOESM5_ESM.pdf]

| REAGENTS                          |                          |            |
|-----------------------------------|--------------------------|------------|
| Immunostaining reagents/materials |                          |            |
| Donkey serum                      | EMD Millipore            | S30-100ML  |
| Goat Serum                        | mpbio                    | 08642921   |
| Triton X-100                      | SIGMA                    | T8787-50ML |
| Paraformaldehyde                  | SIGMA                    | P6148-500G |
| Donkey anti-goat Alexa fluor 488  | Thermo Fisher Scientific | A11055     |
| Donkey anti-mouse Alexa fluor 488 | Thermo Fisher Scientific | A21202     |
| Goat anti-rabbit Alexa fluor 568  | Thermo Fisher Scientific | A11036     |
| Donkey anti-mouse Alexa fluor 568 | Thermo Fisher Scientific | A10037     |
| VECTASHIELD mounting medium       | VECTOR, Inc              | ZC1216     |
| CoverWell imaging chamber         | ThermoFisher Scientific  | C18160     |
| Growth media and supplements      |                          |            |
| DMEM                              | Gibco                    |            |
| Fetal bovine serum (FBS)          | R&D systems              | S11150     |
| hESC qualified Matrigel           | BD Biosciences           | 354277     |
| mTESR1 media                      | Stem Cell Technologies   | 05850      |
| Matrigel                          | BD Biosciences           | 354234     |
| RPMI Medium 1640                  | Thermo Fisher Scientific | 11875      |
| Penicillin-streptomycin (100 x)   | Thermo Fisher Scientific | 15140-122  |
| Defined fetal bovine serum (dFBS) | Hyclone                  | SH30070.02 |
| Advanced DMEM:F12                 | Thermo Fisher Scientific | 12634-010  |
| L-glutamine (100 x )              | Thermo Fisher Scientific | 25030-081  |
| HEPES Buffer                      | Thermo Fisher Scientific | 15630080   |
| 50 x B27 supplement w/o Vitamin A | Thermo Fisher Scientific | 12587-010  |
| N2 Supplement                     | Thermo Fisher Scientific | 17502-048  |
| Enzymes/growth factors            |                          |            |
| Dispase                           | Thermo Fisher Scientific | 17105-041  |

|                                                                         |                           |             |
|-------------------------------------------------------------------------|---------------------------|-------------|
| Activin A                                                               | Cell Guidance Systems     | GFH6        |
| recombinant human FGF4                                                  | R&D Systems               | 235-F4      |
| CHIR99021                                                               | StemGent                  | 04-0004-10  |
| EGF                                                                     | R&D Systems               | 236-EG      |
| Noggin                                                                  | R&D Systems               | 6057-NG     |
| R-spondin 1                                                             | R&D Systems               | 4645-RS     |
| Collagenase Type IA                                                     | Sigma-Aldrich             | C9891       |
| RIPA lysis buffer                                                       | Sigma-Aldrich             | R0278       |
| Protease inhibitors                                                     | Roche Diagnostics         | 0589791001  |
| RNasin Plus Ribonuclease Inhibitors                                     | Promega                   | N2615       |
| SUPERaseIN RNase Inhibitor                                              | Thermo Fisher Scientific  | AM2696      |
| Commercial Assays/kits/materials                                        |                           |             |
| MycoAlert™ mycoplasma detection kit                                     | Lonza                     | LT07-318    |
| MycoAlert™ assay control Set                                            | Lonza                     | LT07-518    |
| CytoTune-IPS 2.0 reprogramming kit                                      | ThermoFisher              | A13780-02   |
| Human Pluripotent Stem Cell Functional Identification Kit               | R&D Systems               | SC027B      |
| RNAscope® 2.5 VS Assay-RED                                              | Advanced Cell Diagnostics | 322250      |
| Dual-Glo® Luciferase Assay System                                       | Promega                   | E2920       |
| mRNA RED detection                                                      | Roche Diagnostics         | 7099037001  |
| hu-PPIB probes                                                          | Advanced Cell Diagnostics | 313909      |
| bacterial dapB                                                          | Advanced Cell Diagnostics | 312039      |
| miRNeasy kits                                                           | Qiagen                    | 217004      |
| TruSeq Total RNA                                                        | Illumina                  | 20020596    |
| ThruPLEX® Illumina next-generation sequencing (NGS) library preparation | Rubicon                   | R400585     |
| Amplification grade DNase I                                             | Invitrogen                | 18068- 015  |
| Human Cytokine Array C5                                                 | RayBiotech                | AAH-CYT-5-2 |
| Reparixin L-lysine salt                                                 | MedChemExpress            | HY-15252    |

|                                                                    |                                                                                     |                                        |
|--------------------------------------------------------------------|-------------------------------------------------------------------------------------|----------------------------------------|
| Thin wall glass capillaries                                        | World Precision Instruments                                                         | TW100F-4                               |
| micropipette holder/tubing                                         | Sutter Instruments                                                                  | BR-MH2/ BR-AT                          |
| Mineral oil                                                        | Thermo Fisher Scientific                                                            | 8042-47-5                              |
| 4 kDa FITC-dextran                                                 | Thermo Fisher Scientific                                                            | D1844                                  |
| Nuclei EZ Lysis Buffer                                             | Sigma                                                                               | N-3408                                 |
| PluriStrainer 5/40/200 µm                                          | PluriSelect                                                                         | 43-50005/040/200                       |
| Software/Tools                                                     |                                                                                     | Versions                               |
| DM IRB upright microscope-40X                                      | Leica                                                                               | LAS X version 3.7.2                    |
| Confocal microscope (DM16000)                                      | Leica                                                                               |                                        |
| Fiji                                                               | <a href="http://fiji.sc">http://fiji.sc</a>                                         | 1.51d (June 2016) – 1.51w (March 2018) |
| Prism-v8 graphing and statistical software                         | GraphPad Software                                                                   |                                        |
| FastQC v0.11.5/MultiQC v0.7                                        | <a href="https://multiqc.info">https://multiqc.info</a>                             |                                        |
| STAR v2.5.3a                                                       | <a href="https://github.com">https://github.com</a>                                 |                                        |
| DEseq2 v3.8                                                        | <a href="https://bioconductor.org">https://bioconductor.org</a>                     |                                        |
| GSEA v2                                                            | <a href="http://software.broadinstitute.org">http://software.broadinstitute.org</a> |                                        |
| Cytoscape v3.5.1                                                   | <a href="https://cytoscape.org">https://cytoscape.org</a>                           |                                        |
| RStudio v3.5.1/3                                                   | <a href="https://r-project.org">https://r-project.org</a>                           | V3.6.2 and 3.5.3                       |
| ggplot2                                                            | <a href="http://ggplot2.org">http://ggplot2.org</a>                                 |                                        |
| Gorilla                                                            | <a href="http://cbl-gorilla.cs">http://cbl-gorilla.cs</a>                           | 2009                                   |
| REVIGO                                                             | <a href="http://revigo.irb.hr">http://revigo.irb.hr</a>                             | 2011                                   |
| Gene Ontology Resource                                             | <a href="http://geneontology.org">http://geneontology.org</a>                       |                                        |
| Draw Venn Diagram                                                  | <a href="http://bioinformatics.psb">http://bioinformatics.psb</a>                   |                                        |
| Cutadapt v1.10                                                     | DOI:10.14806/ej.17.1.200                                                            |                                        |
| Seurat 3.1.2                                                       |                                                                                     |                                        |
| Adobe Illustrator                                                  | CC2019                                                                              |                                        |
| <b>Experimental Models:<br/>Organisms/Strains</b>                  |                                                                                     |                                        |
| NOD.Cg-Prkdc <sup>SCID</sup><br>IL2rg <sup>tm1Wjl</sup> /SzJ (NSG) | In-house breeding service<br>(JAX lab)                                              |                                        |
